# Supplementary material for: Celiac Disease Prevalence Is Increased in Primary Sjögren’s Syndrome and Diffuse Systemic Sclerosis: Lessons from a Large Multi-Center Study
Source: MDPI journal article supplement (doi:10.3390/jcm8040540), 2019-04-19
Supplement: s1 [file s1]

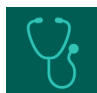

**Supplementary Table 1.** Frequency of celiac disease-specific manifestations in the three groups of AD patients.

| CD features, <i>n</i> (%)          | Total<br>( <i>n</i> = 42) | SLE<br>( <i>n</i> = 10) | pSS ( <i>n</i> = 25) | SSc<br>( <i>n</i> = 7) | <i>p</i> value |
|------------------------------------|---------------------------|-------------------------|----------------------|------------------------|----------------|
| Abdominal distention               | 22 (52%)                  | 6 (60%)                 | 13 (52%)             | 3 (43%)                | 0.8            |
| Iron deficiency anemia             | 19 (45%)                  | 5 (50%)                 | 10 (40%)             | 4 (57%)                | 0.7            |
| Autoimmune thyroiditis             | 19 (45%)                  | 4 (40%)                 | 12 (48%)             | 3 (43%)                | 0.9            |
| Chronic diarrhea                   | 15 (36%)                  | 4 (40%)                 | 9 (36%)              | 2 (29%)                | 0.9            |
| Osteopenia                         | 12 (29%)                  | 2 (20%)                 | 8 (32%)              | 2 (29%)                | 0.8            |
| Loss of appetite                   | 11 (26%)                  | 5 (50%)                 | 4 (16%)              | 2 (29%)                | 0.1            |
| Constipation                       | 8 (19%)                   | 1 (10%)                 | 6 (24%)              | 1 (14%)                | 0.6            |
| Osteoporosis                       | 6 (14%)                   | 1 (10%)                 | 5 (20%)              | 0 (0%)                 | 0.4            |
| Steatorrhea                        | 5 (12%)                   | 0 (0%)                  | 3 (12%)              | 2 (29%)                | 0.2            |
| Muscle hypotrophy                  | 5 (12%)                   | 2 (20%)                 | 2 (8%)               | 1 (14%)                | 0.6            |
| Depression                         | 5 (12%)                   | 2 (20%)                 | 1 (4%)               | 2 (29%)                | 0.1            |
| First-degree family members        | 4 (9%)                    | 1 (10%)                 | 2 (8%)               | 1 (14%)                | 0.7            |
| Dermatitis herpetiformis           | 3 (7%)                    | 0 (0%)                  | 1 (4%)               | 2 (29%)                | <b>0.05</b>    |
| Peripheral neuropathy              | 3 (7%)                    | 0 (0%)                  | 2 (8%)               | 1 (14%)                | 0.5            |
| Infertility/recurrent miscarriages | 3 (7%)                    | 2 (20%)                 | 0 (0%)               | 1 (14%)                | 0.08           |
| Atrophic glossitis                 | 3 (7%)                    | 1 (10%)                 | 2 (8%)               | 0 (0%)                 | 0.7            |
| Epilepsy                           | 1 (2%)                    | 1 (10%)                 | 0 (0%)               | 0 (0%)                 | 0.2            |
| Ataxia                             | 0 (0%)                    | 0 (0%)                  | 0 (0%)               | 0 (0%)                 | NA             |
| Autoimmune hepatitis               | 0 (0%)                    | 0 (0%)                  | 0 (0%)               | 0 (0%)                 | NA             |
| Primary biliary cirrhosis          | 0 (0%)                    | 0 (0%)                  | 0 (0%)               | 0 (0%)                 | NA             |

Statistically significant differences in bold.

NA, not applicable; CD, celiac disease; AD, autoimmune disease; SLE, systemic lupus erythematosus; pSS, primary Sjögren syndrome; SSc, systemic sclerosis.

**Supplementary Table 2.** Frequency of clinical and laboratory features in SLE patients with CD in comparison to those without evidence of CD.

| SLE features                                        | SLE-CD<br>( <i>n</i> = 10) | SLE-non-CD<br>( <i>n</i> = 570) | <i>p</i> value |
|-----------------------------------------------------|----------------------------|---------------------------------|----------------|
| Arthritis/arthralgia, <i>n</i> (%)                  | 6 (60%)                    | 438 (77%)                       | 0.2            |
| Malar rash, <i>n</i> (%)                            | 3 (30%)                    | 261 (46%)                       | 0.3            |
| Photosensitivity, <i>n</i> (%)                      | 3 (30%)                    | 280 (49%)                       | 0.3            |
| Discoid lupus erythematosus, <i>n</i> (%)           | 0 (0%)                     | 30 (5%)                         | 1.0            |
| Oral ulcers, <i>n</i> (%)                           | 0 (0%)                     | 91 (16%)                        | 0.4            |
| Raynaud phenomenon, <i>n</i> (%)                    | 2 (20%)                    | 187 (33%)                       | 0.5            |
| Serositis, <i>n</i> (%)                             | 4 (40%)                    | 114 (20%)                       | 0.1            |
| Lung involvement, <i>n</i> (%)                      | 0 (0%)                     | 36 (6%)                         | 1.0            |
| Pulmonary arterial hypertension, <i>n</i> (%)       | 1 (10%)                    | 8 (1%)                          | 0.1            |
| Lupus glomerulonephritis, <i>n</i> (%)              | 3 (30%)                    | 217 (38%)                       | 0.7            |
| Myositis, <i>n</i> (%)                              | 1 (10%)                    | 14 (2%)                         | 0.2            |
| Peripheral nervous system involvement, <i>n</i> (%) | 1 (10%)                    | 39 (7%)                         | 0.5            |
| Psychosis, <i>n</i> (%)                             | 0 (0%)                     | 11 (2%)                         | 1.0            |
| Epilepsy, <i>n</i> (%)                              | 1 (10%)                    | 21 (4%)                         | 0.3            |
| Leukopenia, <i>n</i> (%)                            | 5 (50%)                    | 174 (30%)                       | 0.3            |
| Immune-hemolytic anemia, <i>n</i> (%)               | 3 (30%)                    | 76 (13%)                        | 0.1            |
| Thrombocytopenia, <i>n</i> (%)                      | 3 (30%)                    | 97 (17%)                        | 0.4            |
| Low complement, <i>n</i> (%)                        | 6 (60%)                    | 320 (56%)                       | 1.0            |
| IgM/IgG anti-cardiolipin, <i>n</i> (%)              | 3 (30%)                    | 129 (23%)                       | 0.7            |
| IgM/IgG anti-β2 glycoprotein I, <i>n</i> (%)        | 2 (20%)                    | 94 (16%)                        | 0.7            |
| Lupus anticoagulant, <i>n</i> (%)                   | 0 (0%)                     | 90 (16%)                        | 0.4            |
| Anti-Sm, <i>n</i> (%)                               | 3 (30%)                    | 82 (14%)                        | 0.2            |
| Anti-RNP, <i>n</i> (%)                              | 1 (10%)                    | 95 (17%)                        | 1.0            |
| Anti-dsDNA, <i>n</i> (%)                            | 0 (0%)                     | 1 (0.2%)                        | 0.6            |
| Anti-Ro52/Ro60, <i>n</i> (%)                        | 1 (10%)                    | 190 (33%)                       | 0.2            |
| Other autoantibodies, <i>n</i> (%)                  | <b>4 (40%)</b>             | <b>30 (5%)</b>                  | <b>0.002</b>   |

Statistically significant differences in bold.

CD, celiac disease; SLE, systemic lupus erythematosus.

**Supplementary Table 3.** Frequency of clinical and laboratory features in pSS patients with CD in comparison to those without evidence of CD.

| pSS features                                        | pSS-CD<br>( <i>n</i> = 25) | pSS-non-CD<br>( <i>n</i> = 329) | <i>p</i> value |
|-----------------------------------------------------|----------------------------|---------------------------------|----------------|
| Xerostomia, <i>n</i> (%)                            | 21 (84%)                   | 286 (87%)                       | 0.5            |
| Xerophthalmia, <i>n</i> (%)                         | 24 (96%)                   | 302 (92%)                       | 0.7            |
| Parotid swelling, <i>n</i> (%)                      | 7 (28%)                    | 132 (40%)                       | 0.3            |
| Vasculitic purpura, <i>n</i> (%)                    | 1 (4%)                     | 37 (11%)                        | 0.5            |
| Arthritis/arthritis, <i>n</i> (%)                   | 16 (64%)                   | 210 (64%)                       | 1.0            |
| Raynaud phenomenon, <i>n</i> (%)                    | 9 (36%)                    | 82 (25%)                        | 0.2            |
| Serositis, <i>n</i> (%)                             | 0 (0%)                     | 20 (6%)                         | 0.4            |
| Lung involvement, <i>n</i> (%)                      | 1 (4%)                     | 23 (7%)                         | 1.0            |
| Kidney involvement, <i>n</i> (%)                    | 1 (4%)                     | 12 (4%)                         | 1.0            |
| MGUS, <i>n</i> (%)                                  | 1 (4%)                     | 16 (5%)                         | 1.0            |
| Lymphoma, <i>n</i> (%)                              | 1 (4%)                     | 11 (3%)                         | 0.6            |
| Myositis, <i>n</i> (%)                              | 0 (0%)                     | 1 (0.3%)                        | 1.0            |
| Central nervous system involvement, <i>n</i> (%)    | 0 (0%)                     | 12 (4%)                         | 1.0            |
| Peripheral nervous system involvement, <i>n</i> (%) | 2 (8%)                     | 50 (15%)                        | 0.5            |
| Autoimmune thyroiditis, <i>n</i> (%)                | <b>12 (48%)</b>            | <b>81 (25%)</b>                 | <b>0.02</b>    |
| Autoimmune hepatitis, <i>n</i> (%)                  | 0 (0%)                     | 9 (3%)                          | 1.0            |
| Low complement, <i>n</i> (%)                        | 4 (16%)                    | 55 (17%)                        | 1.0            |
| Leukopenia, <i>n</i> (%)                            | 8 (32%)                    | 78 (24%)                        | 0.3            |
| Hypergammaglobulinemia, <i>n</i> (%)                | 9 (37%)                    | 133 (40%)                       | 0.8            |
| Cryoglobulins, <i>n</i> (%)                         | 1 (4%)                     | 9 (3%)                          | 0.5            |
| IgM/IgG anti-cardiolipin, <i>n</i> (%)              | 1 (4%)                     | 12 (4%)                         | 1.0            |
| Anti-Ro52/Ro60, <i>n</i> (%)                        | 21 (84%)                   | 244 (74%)                       | 0.3            |
| Anti-La, <i>n</i> (%)                               | 10 (40%)                   | 141 (43%)                       | 0.8            |

Statistically significant differences in bold.

MGUS, monoclonal gammopathy of undetermined significance; CD, celiac disease; pSS, primary Sjögren syndrome.

**Supplementary Table 4.** Frequency of clinical and laboratory features in SSc patients with CD in comparison to those without evidence of CD.

| SSc features                                  | SSc-CD<br>( <i>n</i> = 7) | SSc-non-CD<br>( <i>n</i> = 517) | <i>p</i> value |
|-----------------------------------------------|---------------------------|---------------------------------|----------------|
| Raynaud phenomenon, <i>n</i> (%)              | 7 (100%)                  | 467 (90%)                       | 1.0            |
| Arthritis/arthralgia, <i>n</i> (%)            | 2 (29%)                   | 219 (42%)                       | 0.7            |
| Tendon friction, <i>n</i> (%)                 | 2 (29%)                   | 63 (12%)                        | 0.2            |
| Skin ulcers, <i>n</i> (%)                     | 2 (29%)                   | 185 (36%)                       | 1.0            |
| Serositis, <i>n</i> (%)                       | 1 (14%)                   | 29 (6%)                         | 0.3            |
| Pulmonary fibrosis, <i>n</i> (%)              | 2 (29%)                   | 201 (39%)                       | 0.7            |
| Pulmonary arterial hypertension, <i>n</i> (%) | 1 (14%)                   | 106 (20%)                       | 1.0            |
| Scleroderma renal crisis, <i>n</i> (%)        | 1 (14%)                   | 7 (1%)                          | 0.1            |
| Gastrointestinal involvement, <i>n</i> (%)    | 3 (43%)                   | 255 (49%)                       | 1.0            |
| Myositis, <i>n</i> (%)                        | <b>2 (29%)</b>            | <b>18 (3%)</b>                  | <b>0.03</b>    |

Statistically significant differences in bold.

CD, celiac disease; SSc, systemic sclerosis.
